# Supplementary material for: SERS based detection of multiple analytes from dye/explosive mixtures using picosecond laser fabricated gold nanoparticles and nanostructures
Source: Royal Society of Chemistry journal article supplement (doi:10.1039/c8an01276h), 2019-01-01
Supplement: c8an01276h1.pdf [file c8an01276h1.pdf]

## Supporting Information for

# SERS Based Multiple Analyte Detection from Dyes/Explosives Mixtures Using Picosecond Laser Fabricated Gold Nanoparticles and Nanostructures

Chandu Byram, Sree Satya Bharati Moram and Venugopal Rao Soma<sup>\*,a</sup>

Advanced Centre for Research in High Energy Materials (ACRHEM),

University of Hyderabad, Prof. C. R. Rao Road, Hyderabad 500046, Telangana, India

\*Corresponding author e-mail: [soma\\_venu@uohyd.ac.in](mailto:soma_venu@uohyd.ac.in) OR [soma\\_venu@yahoo.com](mailto:soma_venu@yahoo.com)

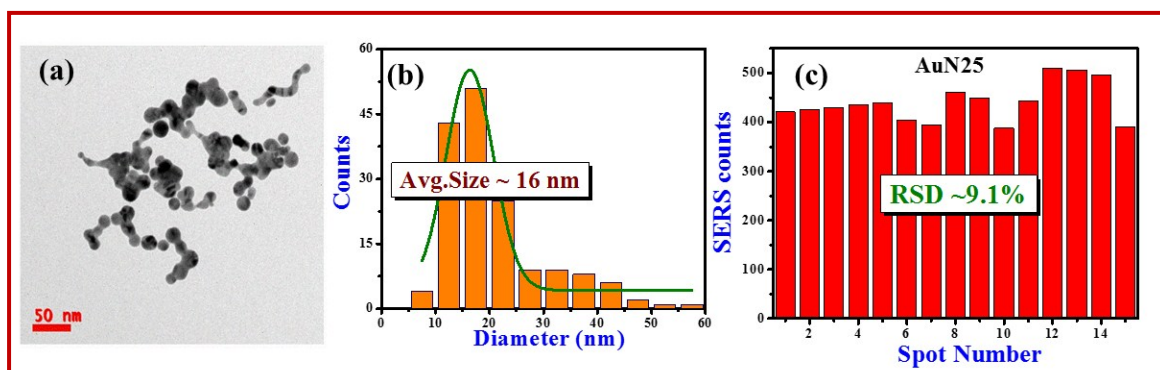

**Figure S1** NPs prepared at second time [repeated for a single energy (25 mJ, AuN25) after few weeks] (a) TEM image (b) NPs size distribution (c) estimated RSD values for SERS signals (DNT, 850  $\text{cm}^{-1}$  mode) obtained at 15 different positions on AuN25 (NPs drop-casted on si) substrate.

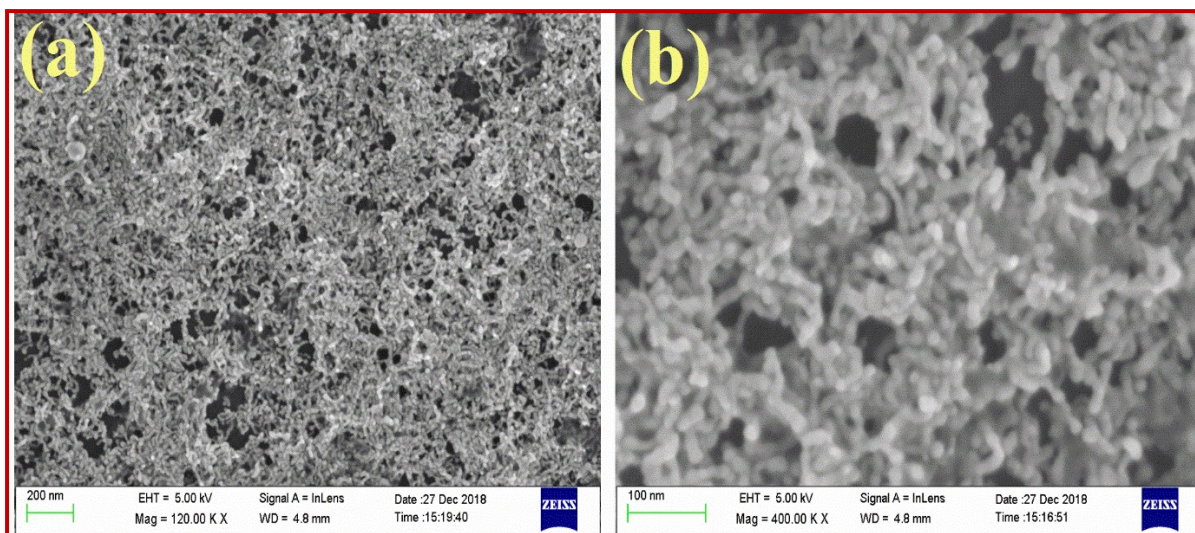

Figure S2 (a) lower and (b) higher magnification FESEM images of the Au N25 nanoparticles drop-casted on Si.

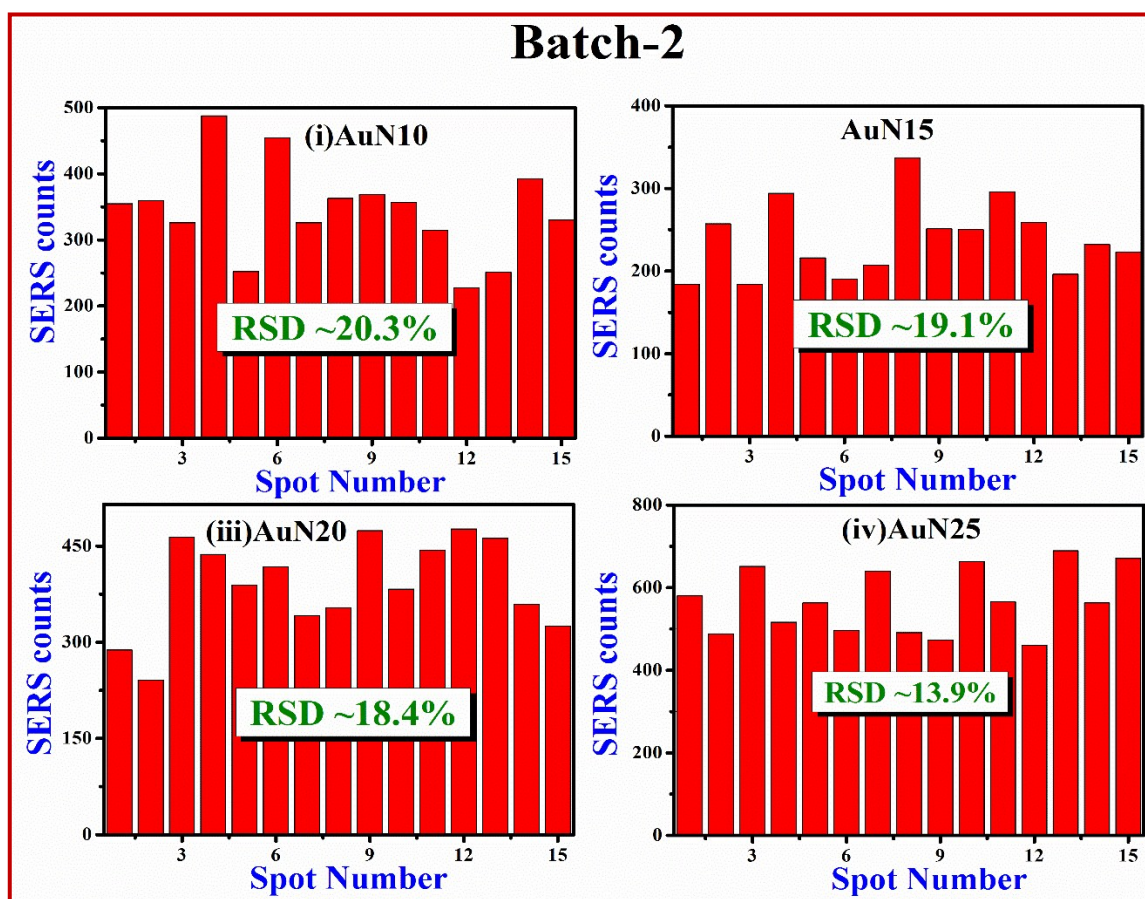

Figure S3 Calculated RSD values for the SERS signals (DNT, 850  $\text{cm}^{-1}$  mode) collected from the 2<sup>nd</sup> batch of fabricated NPs (i) AuN10, (ii) AuN15, (iii) AuN20, and (iv) AuN25.
